# Supplementary material
Source: ML conference proceedings conference paper supplement (https://proceedings.mlr.press/v51/kyrillidis16.html)
Supplement: Supplementary file 1 [file kyrillidis16-supp.pdf]

## 9 Appendix

Here, we report further results on the 2D image recovery problem. We remind that, for the purpose of this experiment, we set up an upper wall time of  $10^4$  seconds (*i.e.*, 2.8 hours) to process 100 frames for each solver. This translates into 100 seconds per frame.

### 9.1 Varying group size $g$

For this case, we focus on a single frame. Due to its higher number of non-zeros, we have selected the frame shown in Figure 6. For this case, we consider a roughly sufficient number of measurements is acquired where  $n = \lceil 0.3 \cdot p \rceil$ . By varying the group size  $g$ , we obtain the results in Figure 6.

### 9.2 Varying number of measurements

Here, let  $g = 4$  as this group selection performs better, as shown in the previous subsection. Here, we consider  $n$  take values from  $n \in \lceil \{0.25, 0.3, 0.35, 0.4\} \cdot p \rceil$ . The results, are shown in Figure 7.

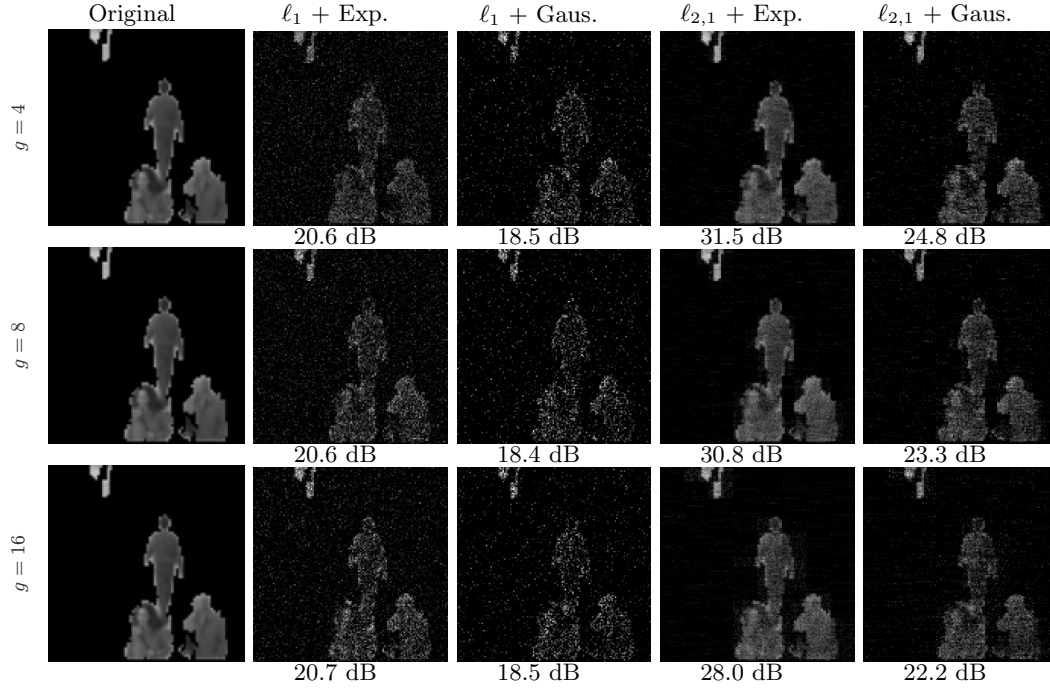

Figure 6: Results from real data. Representative examples of subtracted frame recovery from compressed measurements. Here,  $n = \lceil 0.3 \cdot p \rceil$  measurements are observed for  $p = 2^{16}$ . From top to bottom, each line corresponds to block sparse model  $\mathcal{M}$  with groups of consecutive indices, where  $g = 4$ ,  $g = 8$ , and  $g = 16$ , respectively. One can observe that one obtains worse recovery as the group size increases; thus a model with groups  $g = 4$  is a good choice for this case.

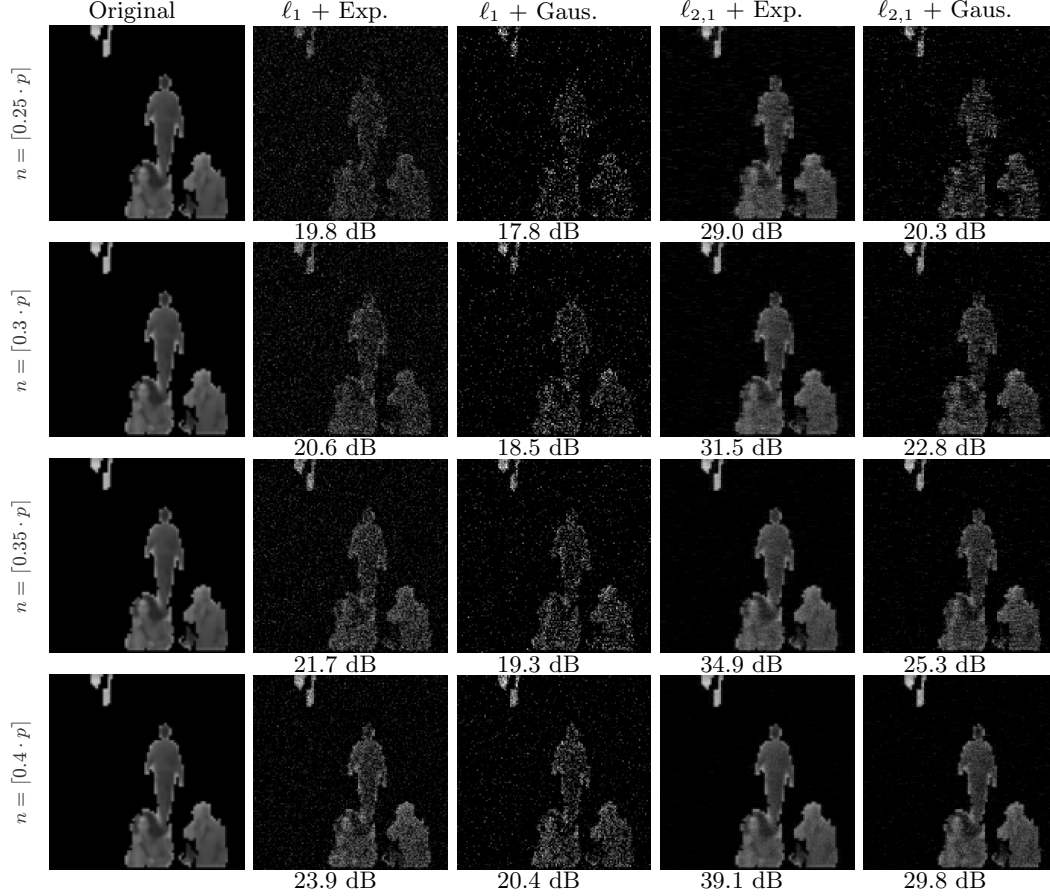

Figure 7: Results from real data. Representative examples of subtracted frame recovery from compressed measurements. Here, we consider a block sparse model fixed, with  $g = 4$  block size per group. From top to bottom, the number of measurements range from  $\lceil 0.25 \cdot p \rceil$  to  $\lceil 0.4 \cdot p \rceil$ , for  $p = 2^{16}$ . One can observe that one obtains better recovery as the number of measurements increases.
